# Supplementary material
Source: PubMed Central journal article supplement (PMC6434136)
Supplement: IAI.00884-18-s0001.pdf [file IAI.00884-18-s0001.pdf]

## **Supplemental information**

**Supplemental Figure 1. Growth of *S. aureus* ATCC29213 in supMH and MEM.** Growth of bacteria inoculated into supMH or MEM media, as measured by photometric absorbance at 600nm. Error bars indicate standard deviation of four separate measurements.

**Supplemental Figure 2. Colony morphologies of evolved isolates.** **A.** Growth phenotypes on blood agar. Isolate labels in blue indicate SCV morphology, and black labels are consistent with the parental strain. **B.** Pigmentation phenotypes on blood agar. Isolate labels in dull yellow indicate moderately increased pigmentation, bright yellow show markedly increased pigmentation, and black labels are consistent with the parental strain.

**Supplemental Table 1. Virulence activity of selected isolates relative to parental strain.**

**Supplemental Table 2. Growth rates of selected isolates relative to parental strain.**

**Supplemental Table 3. Real time PCR quantitation of *sigB* and *agrA* expression relative to parental strain.**

**Supplemental Table 4. Coding variants identified by whole genome sequencing.**

**Supplemental Table 5. Virulence of single gene mutant strains relative to parental strain.**

**Supplemental Table 6. Virulence activity of complemented gene deletion strains.**

**Supplemental Table 7. Virulence activity of epistatic mutations.**

**Supplemental Table 8. Oligonucleotide sequences**

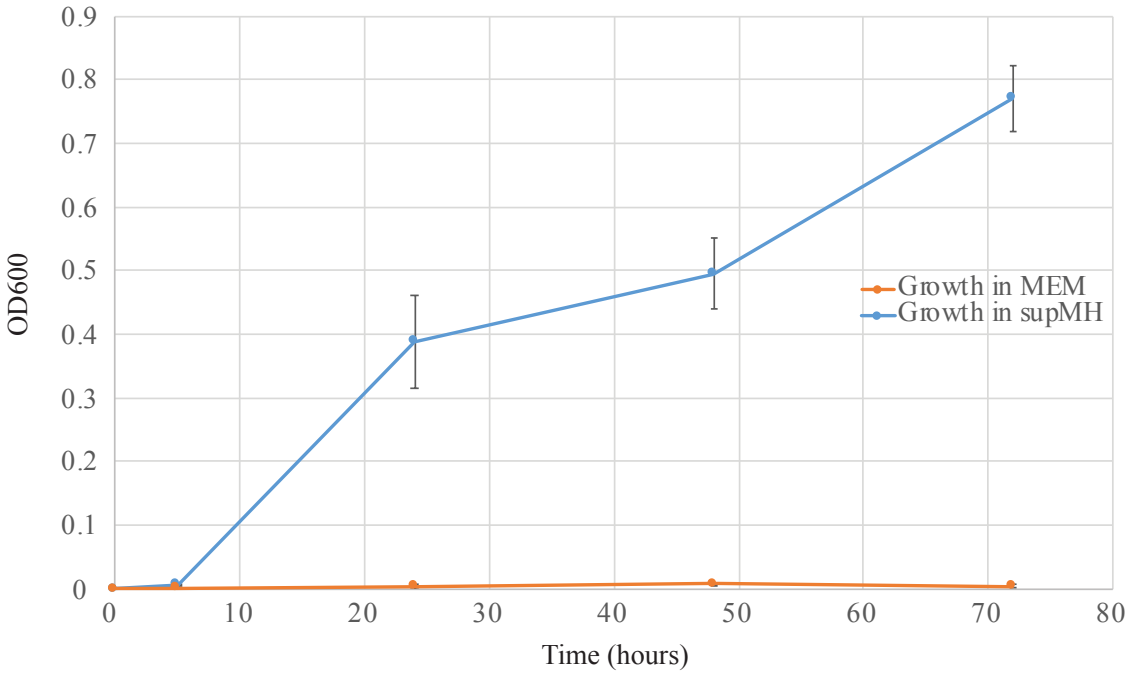

**A.**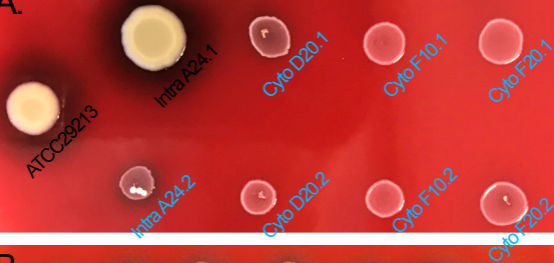**B.**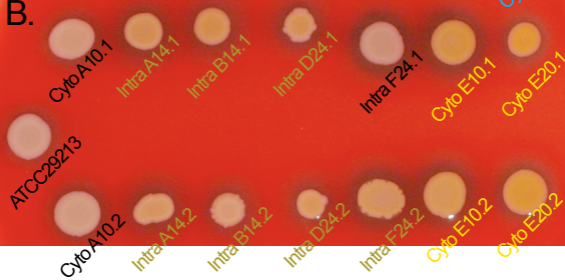

**Supplemental Table 1: Virulence activity of selected isolates relative to parental strain**

| Strain      | Cytotoxicity    |      |          | Invasiveness    |       |          |
|-------------|-----------------|------|----------|-----------------|-------|----------|
|             | Fold difference | SEM  | $p^*$    | Fold difference | SEM   | $p^*$    |
| Cyto A10.1  | 1.11            | 0.02 | 4.78E-04 | 1.96            | 0.94  | 2.57E-01 |
| Cyto A10.2  | 1.16            | 0.03 | 8.48E-04 | 0.49            | 0.14  | 1.78E-03 |
| Cyto B10.1  | 1.10            | 0.03 | 6.83E-03 | 1.73            | 0.52  | 6.70E-02 |
| Cyto B10.2  | 1.18            | 0.04 | 4.04E-03 | 0.91            | 0.25  | 6.31E-01 |
| Cyto C10.1  | 1.22            | 0.04 | 7.74E-04 | 0.87            | 0.05  | 1.58E-01 |
| Cyto C10.2  | 1.08            | 0.01 | 3.98E-04 | 1.46            | 0.05  | 2.62E-04 |
| Cyto D10.1  | 1.09            | 0.02 | 2.38E-04 | 0.52            | 0     | 8.39E-05 |
| Cyto D10.2  | 1.12            | 0.02 | 5.19E-06 | 2.89            | 0.59  | 8.50E-04 |
| Cyto E10.1  | 1.11            | 0.02 | 1.35E-03 | 1.09            | 0.61  | 8.81E-01 |
| Cyto E10.2  | 1.09            | 0.02 | 3.34E-03 | 1.74            | 0.08  | 9.87E-06 |
| Cyto F10.1  | 1.07            | 0.03 | 3.72E-02 | 19.48           | 1.98  | 7.24E-08 |
| Cyto F10.2  | 1.06            | 0.02 | 6.63E-03 | 4.75            | 0.34  | 2.32E-08 |
| Cyto A20.1  | 1.14            | 0.04 | 1.06E-03 | 10.93           | 1.75  | 7.50E-06 |
| Cyto A20.2  | 1.08            | 0.03 | 2.35E-02 | 6.14            | 0.53  | 6.08E-08 |
| Cyto B20.1  | 1.07            | 0.03 | 1.37E-02 | 5.66            | 0.7   | 2.00E-06 |
| Cyto B20.2  | 1.03            | 0.03 | 3.93E-01 | 18.48           | 0.61  | 1.32E-12 |
| Cyto C20.1  | 1.06            | 0.04 | 1.37E-01 | 10.75           | 1.59  | 3.77E-06 |
| Cyto C20.2  | 0.97            | 0.03 | 4.23E-01 | 91.58           | 6.94  | 2.83E-09 |
| Cyto D20.1  | 1.31            | 0.11 | 8.68E-03 | 11.58           | 0.62  | 2.32E-10 |
| Cyto D20.2  | 1.28            | 0.08 | 1.66E-03 | 47.7            | 11.4  | 1.15E-04 |
| Cyto E20.1  | 1.09            | 0.04 | 1.75E-02 | 152             | 11.98 | 3.95E-09 |
| Cyto E20.2  | 1.03            | 0.04 | 4.92E-01 | 58.68           | 7.99  | 8.05E-07 |
| Cyto F20.1  | 1.30            | 0.10 | 9.02E-03 | 30.2            | 2.9   | 3.51E-08 |
| Cyto F20.2  | 1.45            | 0.13 | 2.37E-03 | 33.33           | 1.81  | 1.29E-10 |
| Intra A14.1 | 1.12            | 0.13 | 1.67E-05 | 6.2             | 1.3   | 1.33E-03 |
| Intra A14.2 | 1.54            | 0.11 | 1.30E-14 | 151.25          | 11.91 | 3.92E-09 |
| Intra B14.1 | 1.10            | 0.50 | 2.90E-01 | 1.73            | 0.33  | 1.17E-02 |
| Intra B14.2 | 1.18            | 0.26 | 2.73E-03 | 1.75            | 0.51  | 1.42E-01 |
| Intra C14.1 | 1.16            | 0.43 | 7.50E-02 | 15.65           | 1.21  | 5.90E-09 |
| Intra C14.2 | 1.20            | 0.22 | 1.22E-03 | 13.33           | 1.22  | 3.44E-08 |
| Intra D14.1 | 1.16            | 0.27 | 7.89E-05 | 6.41            | 2.11  | 3.37E-03 |
| Intra D14.2 | 1.04            | 0.23 | 1.96E-01 | 10.23           | 0.91  | 3.32E-08 |
| Intra E14.1 | 1.14            | 0.37 | 1.52E-02 | 8.74            | 1.01  | 5.04E-07 |
| Intra E14.2 | 1.13            | 0.31 | 3.80E-02 | 5.87            | 0.7   | 7.10E-06 |
| Intra F14.1 | 1.14            | 0.12 | 1.76E-04 | 20.68           | 3.59  | 9.96E-06 |
| Intra F14.2 | 1.19            | 0.16 | 1.54E-04 | 18.03           | 1.6   | 2.07E-08 |
| Intra A24.1 | 1.75            | 0.24 | 4.08E-11 | 109.03          | 9.09  | 7.00E-09 |
| Intra A24.2 | 1.62            | 0.71 | 1.34E-06 | 66.38           | 2.58  | 4.13E-12 |
| Intra B24.1 | 1.79            | 0.32 | 1.88E-11 | 205.25          | 5.76  | 1.44E-13 |
| Intra B24.2 | 1.91            | 0.43 | 3.38E-07 | 78.73           | 16.23 | 3.14E-05 |
| Intra C24.1 | 1.26            | 0.25 | 2.73E-07 | 9.93            | 0.94  | 6.66E-08 |
| Intra C24.2 | 1.27            | 0.45 | 7.15E-04 | 25.5            | 1.65  | 8.19E-10 |
| Intra D24.1 | 1.78            | 0.27 | 1.48E-07 | 109             | 1.91  | 1.41E-15 |
| Intra D24.2 | 1.83            | 0.48 | 1.28E-05 | 717.75          | 80.16 | 3.67E-07 |
| Intra E24.1 | 1.27            | 0.61 | 1.57E-02 | 80.88           | 7.5   | 2.04E-08 |
| Intra E24.2 | 1.25            | 0.38 | 6.39E-03 | 47.7            | 4.03  | 8.99E-09 |
| Intra F24.1 | 1.20            | 0.21 | 1.03E-03 | 36.98           | 1.43  | 4.31E-12 |
| Intra F24.2 | 1.07            | 0.43 | 3.85E-01 | 5.83            | 1.2   | 1.23E-03 |

\*2-tailed T-test

**Supplemental Table 2: Growth rate of selected isolates relative to parental strain**

| Strain      | Fold Difference | SEM  | <i>p</i> * |
|-------------|-----------------|------|------------|
| Cyto A10.1  | 0.88            | 0.01 | 4.32E-01   |
| Cyto A10.2  | 0.82            | 0.02 | 2.63E-01   |
| Cyto B10.1  | 0.89            | 0.00 | 4.86E-01   |
| Cyto B10.2  | 0.93            | 0.09 | 6.65E-01   |
| Cyto C10.1  | 0.92            | 0.05 | 6.20E-01   |
| Cyto C10.2  | 1.09            | 0.06 | 5.74E-01   |
| Cyto D10.1  | 1.02            | 0.04 | 9.15E-01   |
| Cyto D10.2  | 1.07            | 0.04 | 6.38E-01   |
| Cyto E10.1  | 1.09            | 0.03 | 5.82E-01   |
| Cyto E10.2  | 1.03            | 0.04 | 8.47E-01   |
| Cyto F10.1  | 1.21            | 0.05 | 2.42E-01   |
| Cyto F10.2  | 1.24            | 0.06 | 4.09E-01   |
| Cyto A20.1  | 0.87            | 0.07 | 4.21E-01   |
| Cyto A20.2  | 0.95            | 0.07 | 7.73E-01   |
| Cyto B20.1  | 1.00            | 0.03 | 9.95E-01   |
| Cyto B20.2  | 1.27            | 0.12 | 1.30E-01   |
| Cyto C20.1  | 1.09            | 0.03 | 5.71E-01   |
| Cyto C20.2  | 1.01            | 0.07 | 9.54E-01   |
| Cyto D20.1  | 1.35            | 0.01 | 3.83E-02   |
| Cyto D20.2  | 1.32            | 0.01 | 5.45E-02   |
| Cyto E20.1  | 1.37            | 0.03 | 3.18E-02   |
| Cyto E20.2  | 1.16            | 0.03 | 3.29E-01   |
| Cyto F20.1  | 1.20            | 0.04 | 2.13E-01   |
| Cyto F20.2  | 1.13            | 0.02 | 3.37E-01   |
| Intra A14.1 | 1.73            | 0.10 | 6.30E-04   |
| Intra A14.2 | 1.67            | 0.05 | 8.96E-04   |
| Intra B14.1 | 1.44            | 0.04 | 1.35E-02   |
| Intra B14.2 | 1.49            | 0.07 | 8.25E-03   |
| Intra C14.1 | 1.82            | 0.02 | 1.32E-04   |
| Intra C14.2 | 1.67            | 0.04 | 8.46E-04   |
| Intra D14.1 | 1.29            | 0.11 | 1.05E-01   |
| Intra D14.2 | 1.54            | 0.10 | 5.27E-03   |
| Intra E14.1 | 1.57            | 0.07 | 3.32E-03   |
| Intra E14.2 | 1.74            | 0.04 | 3.43E-04   |
| Intra F14.1 | 1.94            | 0.07 | 4.67E-05   |
| Intra F14.2 | 1.65            | 0.01 | 1.03E-03   |
| Intra A24.1 | 1.85            | 0.09 | 2.06E-05   |
| Intra A24.2 | 1.78            | 0.11 | 1.54E-05   |
| Intra B24.1 | 1.49            | 0.08 | 8.42E-03   |
| Intra B24.2 | 1.69            | 0.05 | 6.83E-04   |
| Intra C24.1 | 1.66            | 0.04 | 8.99E-04   |
| Intra C24.2 | 1.56            | 0.13 | 5.31E-03   |
| Intra D24.1 | 1.88            | 0.10 | 1.30E-04   |
| Intra D24.2 | 1.78            | 0.05 | 2.50E-04   |
| Intra E24.1 | 1.55            | 0.04 | 3.41E-03   |
| Intra E24.2 | 1.23            | 0.07 | 1.67E-01   |
| Intra F24.1 | 1.90            | 0.02 | 5.52E-05   |
| Intra F24.2 | 1.69            | 0.16 | 1.84E-03   |

\*2-tailed T-test

**Supplemental Table 3: Real time PCR quantitation of *sigB* and *agrA* expression relative to parental strain**

| Sample Name | <i>agrA</i> |      |            | <i>sigB</i> |      |            |
|-------------|-------------|------|------------|-------------|------|------------|
|             | Average RQ  | SEM  | <i>p</i> * | Average RQ  | SEM  | <i>p</i> * |
| Cyto A10.1  | 0.85        | 0.01 | 2.02E-02   | 1.20        | 0.02 | 1.24E-03   |
| Cyto A10.2  | 1.02        | 0.02 | 7.28E-01   | 1.39        | 0.03 | 4.27E-04   |
| Cyto B10.1  | 51.22       | 1.03 | 2.34E-06   | 0.73        | 0.01 | 1.71E-05   |
| Cyto B10.2  | 8.37        | 0.31 | 4.39E-05   | 1.32        | 0.02 | 1.27E-04   |
| Cyto C10.1  | 3.59        | 0.07 | 8.97E-06   | 2.26        | 0.03 | 6.82E-06   |
| Cyto C10.2  | 1.54        | 0.02 | 3.94E-04   | 2.01        | 0.02 | 1.58E-06   |
| Cyto D10.1  | 2.38        | 0.03 | 5.57E-03   | 1.28        | 0.01 | 5.67E-05   |
| Cyto D10.2  | 1.44        | 0.04 | 1.92E-01   | 1.78        | 0.05 | 2.13E-04   |
| Cyto E10.1  | 3.24        | 0.16 | 2.09E-03   | 1.80        | 0.06 | 5.70E-04   |
| Cyto E10.2  | 4.14        | 0.10 | 3.43E-04   | 2.24        | 0.14 | 2.15E-03   |
| Cyto F10.1  | 1.41        | 0.04 | 2.17E-01   | 1.82        | 0.03 | 2.83E-05   |
| Cyto F10.2  | 1.36        | 0.04 | 2.80E-01   | 2.09        | 0.03 | 7.35E-06   |
| Cyto A20.1  | 1.19        | 0.01 | 1.18E-03   | 2.09        | 0.08 | 6.06E-04   |
| Cyto A20.2  | 1.27        | 0.01 | 2.35E-04   | 2.10        | 0.02 | 7.67E-05   |
| Cyto B20.1  | 1.37        | 0.00 | 4.95E-05   | 1.66        | 0.02 | 6.01E-04   |
| Cyto B20.2  | 1.45        | 0.07 | 6.91E-03   | 1.39        | 0.16 | 1.32E-01   |
| Cyto C20.1  | 4.87        | 0.06 | 7.93E-07   | 1.13        | 0.01 | 9.52E-02   |
| Cyto C20.2  | 2.91        | 0.18 | 9.01E-04   | 2.47        | 0.03 | 3.46E-05   |
| Cyto D20.1  | 1.29        | 0.02 | 8.65E-04   | 2.17        | 0.12 | 1.45E-03   |
| Cyto D20.2  | 1.18        | 0.03 | 8.81E-03   | 1.85        | 0.03 | 3.52E-05   |
| Cyto E20.1  | 1.56        | 0.13 | 2.33E-02   | 0.87        | 0.01 | 8.86E-03   |
| Cyto E20.2  | 1.04        | 0.06 | 6.15E-01   | 1.45        | 0.02 | 2.16E-04   |
| Cyto F20.1  | 1.22        | 0.08 | 8.06E-02   | 1.37        | 0.02 | 4.31E-04   |
| Cyto F20.2  | 1.17        | 0.03 | 1.74E-02   | 1.28        | 0.02 | 1.03E-03   |
| Intra A14.1 | 0.60        | 0.01 | 1.08E-04   | 0.90        | 0.04 | 8.14E-02   |
| Intra A14.2 | 0.53        | 0.03 | 4.22E-04   | 0.96        | 0.03 | 3.19E-01   |
| Intra B14.1 | 0.98        | 0.06 | 7.93E-01   | 1.05        | 0.06 | 5.27E-01   |
| Intra B14.2 | 9.38        | 0.56 | 2.49E-04   | 0.79        | 0.03 | 3.00E-03   |
| Intra C14.1 | 0.47        | 0.03 | 2.14E-04   | 1.28        | 0.02 | 5.78E-04   |
| Intra C14.2 | 1.02        | 0.04 | 7.88E-01   | 0.87        | 0.01 | 7.27E-04   |
| Intra D14.1 | 0.76        | 0.06 | 6.26E-02   | 1.07        | 0.05 | 4.73E-01   |
| Intra D14.2 | 215.42      | 8.79 | 3.75E-05   | 1.74        | 0.04 | 5.52E-04   |
| Intra E14.1 | 1.39        | 0.07 | 1.97E-02   | 0.96        | 0.01 | 4.66E-01   |
| Intra E14.2 | 0.84        | 0.07 | 1.96E-01   | 1.23        | 0.13 | 2.61E-01   |
| Intra F14.1 | 0.60        | 0.01 | 3.17E-03   | 1.00        | 0.03 | 9.41E-01   |
| Intra F14.2 | 9.65        | 0.36 | 4.07E-05   | 0.51        | 0.01 | 1.17E-03   |
| Intra A24.1 | 1.27        | 0.02 | 4.03E-04   | 1.09        | 0.01 | 1.70E-01   |
| Intra A24.2 | 4.39        | 0.15 | 5.34E-05   | 1.10        | 0.02 | 1.72E-01   |
| Intra B24.1 | 4.16        | 0.02 | 1.05E-08   | 1.22        | 0.05 | 4.60E-02   |
| Intra B24.2 | 8.26        | 0.26 | 2.34E-05   | 1.09        | 0.02 | 1.74E-01   |
| Intra C24.1 | 1.49        | 0.07 | 3.76E-03   | 1.15        | 0.02 | 6.43E-02   |
| Intra C24.2 | 7.31        | 0.22 | 1.93E-05   | 1.01        | 0.02 | 9.52E-01   |
| Intra D24.1 | 4.35        | 0.14 | 5.06E-05   | 1.48        | 0.03 | 3.33E-04   |
| Intra D24.2 | 2.80        | 0.04 | 1.28E-05   | 1.17        | 0.04 | 2.76E-02   |
| Intra E24.1 | 110.13      | 7.95 | 3.61E-04   | 2.43        | 0.06 | 3.37E-05   |
| Intra E24.2 | 3.16        | 0.35 | 7.62E-03   | 1.22        | 0.03 | 5.74E-03   |
| Intra F24.1 | 13.23       | 0.16 | 3.73E-07   | 1.12        | 0.02 | 5.70E-03   |
| Intra F24.2 | 0.63        | 0.06 | 1.61E-02   | 0.86        | 0.03 | 1.33E-02   |

\*2-tailed T-test



**Supplementary Table 5: Virulence of single gene mutant strains relative to parental strain.**

| Strain                             | Cytotoxicity    |      |            | Invasiveness    |      |          |
|------------------------------------|-----------------|------|------------|-----------------|------|----------|
|                                    | Fold Difference | SEM  | <i>p</i> * | Fold Difference | SEM  | <i>p</i> |
| ATCC29213 $\Delta$ <i>aroE</i>     | 1.01            | 0.01 | 4.38E-01   | 0.28            | 0.07 | 5.47E-07 |
| ATCC29213 $\Delta$ <i>brnQ2</i>    | 1.04            | 0.01 | 1.13E-03   | 0.17            | 0.05 | 1.65E-08 |
| ATCC29213 $\Delta$ <i>ctaB</i>     | 1.03            | 0.02 | 1.11E-01   | 11.44           | 0.95 | 2.82E-13 |
| ATCC29213 $\Delta$ <i>menF</i>     | 0.99            | 0.02 | 8.36E-01   | 1.00            | 0.14 | 9.56E-01 |
| ATCC29213 <i>mnhA</i> Ala722Thr    | 1.01            | 0.02 | 4.98E-01   | 0.37            | 0.10 | 1.38E-05 |
| ATCC29213 $\Delta$ <i>murA</i>     | 1.07            | 0.02 | 1.00E-03   | 0.03            | 0.01 | 1.89E-10 |
| ATCC29213 $\Delta$ <i>nupC</i>     | 1.02            | 0.01 | 9.94E-02   | 0.12            | 0.04 | 2.48E-09 |
| ATCC29213 $\Delta$ <i>purR</i>     | 1.23            | 0.05 | 8.75E-05   | 8.81            | 0.36 | 1.46E-18 |
| ATCC29213 $\Delta$ <i>qoxD</i>     | 1.11            | 0.02 | 1.89E-06   | 24.23           | 4.69 | 8.76E-06 |
| ATCC29213 $\Delta$ <i>saeS</i>     | 1.00            | 0.01 | 9.94E-01   | 0.04            | 0.00 | 2.28E-10 |
| ATCC29213 $\Delta$ <i>srrA</i>     | 1.00            | 0.01 | 7.33E-01   | 0.07            | 0.01 | 4.24E-10 |
| ATCC29213 <i>tufA</i> Ala271Val    | 1.07            | 0.03 | 9.90E-02   | 0.05            | 0.01 | 3.07E-10 |
| ATCC29213 $\Delta$ <i>ubiE</i>     | 0.96            | 0.02 | 6.15E-02   | 2.59            | 0.42 | 1.46E-04 |
| ATCC29213 $\Delta$ <i>unnamedA</i> | 1.04            | 0.02 | 2.38E-02   | 0.09            | 0.01 | 6.25E-10 |
| ATCC29213 $\Delta$ <i>unnamedB</i> | 1.07            | 0.02 | 2.46E-04   | 5.24            | 0.76 | 3.60E-06 |
| ATCC29213 $\Delta$ <i>yhcF</i>     | 1.00            | 0.01 | 8.27E-01   | 0.43            | 0.03 | 2.24E-06 |
| ATCC29213 $\Delta$ <i>ypfH</i>     | 1.02            | 0.02 | 2.83E-01   | 0.18            | 0.04 | 1.02E-08 |
| JE2 <i>ebH::bursa aurealis</i>     | 1.07            | 0.01 | 3.93E-04   | 2.02            | 0.39 | 3.53E-02 |
| JE2 <i>ndhC::bursa aurealis</i>    | 1.06            | 0.02 | 8.29E-03   | 16.60           | 4.21 | 3.78E-03 |
| JE2 <i>menD::bursa aurealis</i>    | 1.05            | 0.01 | 7.90E-03   | 1.83            | 0.53 | 1.39E-01 |
| JE2 <i>sdrC::bursa aurealis</i>    | 1.08            | 0.01 | 2.30E-05   | 7.94            | 0.47 | 1.09E-08 |

\*2-tailed T-test



**Supplemental Table 6: Virulence of complemented gene deletion strains**

| Strain Background           | Complemented Mutation     | Cytotoxicity    |      |          | Invasiveness    |      |          |
|-----------------------------|---------------------------|-----------------|------|----------|-----------------|------|----------|
|                             |                           | Fold Difference | SEM  | p*       | Fold Difference | SEM  | p*       |
| ATCC29213 $\Delta$ aroE     | <i>aroE</i> Thr182Ile     | 0.99            | 0.01 | 5.08E-01 | 4.20            | 0.74 | 3.59E-02 |
| ATCC29213 $\Delta$ saeS     | <i>saeS</i> Ala106Thr     | 0.99            | 0.03 | 7.57E-01 | 2.33            | 0.09 | 5.85E-04 |
| ATCC29213 $\Delta$ brnQ2    | <i>brnQ2</i> Asp198Tyr    | 1.02            | 0.02 | 3.93E-01 | 1.55            | 0.47 | 9.14E-02 |
| ATCC29213 $\Delta$ nupC     | <i>nupC</i> Pro189Leu     | 0.98            | 0.04 | 5.91E-01 | 1.32            | 0.24 | 2.73E-01 |
| ATCC29213 $\Delta$ unnamedA | <i>unnamedA</i> Asp486Glu | 1.05            | 0.05 | 8.20E-01 | 2.87            | 0.49 | 3.70E-02 |
| ATCC29213 $\Delta$ yhcF     | <i>yhcF</i> Thr74Ile      | 0.96            | 0.02 | 1.16E-01 | 8.81            | 1.57 | 7.45E-04 |
| ATCC29213 $\Delta$ ctaB     | <i>ctaB</i> Thr222Ile     | 1.05            | 0.04 | 6.36E-01 | 6.15            | 1.16 | 1.00E-03 |

\*2-tailed paired t-test comparing mutant complementation vector to wild type complementation vector

| Supplementary Table 7: Virulence activity of epistatic mutations |                                       |      |                                    |                                         |                                       |      |                                    |                                         |
|------------------------------------------------------------------|---------------------------------------|------|------------------------------------|-----------------------------------------|---------------------------------------|------|------------------------------------|-----------------------------------------|
| Strain                                                           | Cytotoxicity                          |      |                                    |                                         | Invasiveness                          |      |                                    |                                         |
|                                                                  | Fold difference relative to ATCC29213 | SEM  | Significance relative to ATCC29213 | Significance relative to double mutant* | Fold difference relative to ATCC29213 | SEM  | Significance relative to ATCC29213 | Significance relative to double mutant* |
| ATCC29213 <i>tufA</i><br>Ala271Val                               | 1.23                                  | 0.05 | 8.67E-02                           | 5.83E-02                                | 0.07                                  | 0.01 | 7.50E-07                           | 6.62E-06                                |
| ATCC29213 $\Delta$ <i>purR</i>                                   | 1.07                                  | 0.03 | 2.19E-01                           | 1.15E-01                                | 8.24                                  | 1.87 | 3.70E-02                           | 6.73E-03                                |
| ATCC29213 <i>tufA</i><br>Ala271Val $\Delta$ <i>purR</i>          | 0.97                                  | 0.03 | 4.23E-01                           | N/A                                     | 18.32                                 | 2.63 | 5.85E-04                           | N/A                                     |

\* 2-tailed T-test

Supplementary Table 8. Summary of oligonucleotides used

| Oligonucleotide Name                     | Oligonucleotide Sequence                                                                                                                      | Purpose / Notes                                                                        |
|------------------------------------------|-----------------------------------------------------------------------------------------------------------------------------------------------|----------------------------------------------------------------------------------------|
| TT_R                                     | AAACGTGGCGCCTGTCACTTTGCTTAT                                                                                                                   | Use to amplify TT element from pCN50.                                                  |
| TT_R                                     | TTATCTGAATTCAGCGCGCCTATTCTAAATG                                                                                                               | Use to amplify TT element from pCN50.                                                  |
| aroE_expression_F_sbfI                   | GTTTTT CCTGCAGG CCGCTTGA AAAAATAACCAAGTT                                                                                                      | Use to amplify aroE for cloning into complementation vector                            |
| aroE_expression_R_xmal                   | GTTTTT CCGGG ATCGGATCAATATTGTGTCTAAC                                                                                                          | Use to amplify aroE for cloning into complementation vector                            |
| Brnq2_expression_F_sbfI                  | GTTTTT CCTGCAGG TGAATTTGTAAATAAAGTCATCAGT                                                                                                     | Use to amplify BrnQ2 for cloning into complementation vector                           |
| Brnq2_expression_R_xmal                  | GTTTTT CCGGG TCAAGGACCGAATAAACAATCATA                                                                                                         | Use to amplify BrnQ2 for cloning into complementation vector                           |
| nupC_expression_F_sbfI                   | GTTTTT CCTGCAGG ATATGGCCTTGAAGTGTCTATGAT                                                                                                      | Use to amplify nupC for cloning into complementation vector                            |
| nupC_expression_R_xmal                   | GTTTTT CCGGG GTCCAAGCATCTACCTATATCAAT                                                                                                         | Use to amplify nupC for cloning into complementation vector                            |
| unnamedA_expression_F_sbfI               | GTTTTT CCTGCAGG ATAGCATGCAAAATCAACACAAGTA                                                                                                     | Use to amplify unnamedA for cloning into complementation vector                        |
| unnamedA_expression_R_xmal               | GTTTTT CCGGG TTCTCTCTTTCTATCGTAAACT                                                                                                           | Use to amplify unnamedA for cloning into complementation vector                        |
| YhcF_expression_F_sbfI                   | GTTTTT CCTGCAGG TACCAAGATAAAGTGTGTGGTG                                                                                                        | Use to amplify yhcF for cloning into complementation vector                            |
| YhcF_expression_R_xmal                   | GTTTTT CCGGG ATCCTTGAGGAACCTTGAAGAGAT                                                                                                         | Use to amplify yhcF for cloning into complementation vector                            |
| ctaB_expression_F_sbfI                   | GTTTTTCTGCAGGATTTGGATAAATTTTAAACAGCGTGA                                                                                                       | Use to amplify ctaB for cloning into complementation vector                            |
| ctaB_expression_R_xmal                   | GTTTTTCCCGGATTCGACTAATGACAATACATGTCCG                                                                                                         | Use to amplify ctaB for cloning into complementation vector                            |
| sae_operon_F_sbfI                        | GTTTTT CCGGG GTTGTGTTTATTGTGGCAAAAGGTTTAT                                                                                                     | Use to amplify sae operon for cloning into complementation vector                      |
| sae_operon_R_xmal                        | GTTTTT CCGGG GCTATTTTTATTAGCGCGCATACAG                                                                                                        | Use to amplify sae operon for cloning into complementation vector                      |
| BrnQ2_amp_FV2                            | TGTAGTGTATTCCAGAGAGCTTA                                                                                                                       | Use to amplify brnQ2 locus for confirmation of successful recombining                  |
| BrnQ2_amp_RV2                            | CTTGATACATTGAAACGCTACACAGC                                                                                                                    | Use to amplify brnQ2 locus for confirmation of successful recombining                  |
| srrA_amp_FV2                             | TGATAGAGGACGTACAGTGGTTACA                                                                                                                     | Use to amplify srrA locus for confirmation of successful recombining                   |
| srrA_amp_RV2                             | CCAGGATTTCAATTAATGTTTGAC                                                                                                                      | Use to amplify srrA locus for confirmation of successful recombining                   |
| ctaB_amp_F                               | TGTTTATTATTTCCCTTTTCCA                                                                                                                        | Use to amplify ctaB locus for confirmation of successful recombining                   |
| ctaB_amp_R                               | CTTTTGGCAAACAATTTATACACC                                                                                                                      | Use to amplify ctaB locus for confirmation of successful recombining                   |
| MenF_amp_F                               | GTA AAAACTTGCCTTCTGTTAAAGCTG                                                                                                                  | Use to amplify menF locus for confirmation of successful recombining                   |
| MenF_amp_R                               | GACGTGAAAAATGCAAGATAAGTT                                                                                                                      | Use to amplify menF locus for confirmation of successful recombining                   |
| MnhA_amp_F                               | AATTTGCCCTAAAATTTGGAAGTATC                                                                                                                    | Use to amplify mnhA locus for confirmation of successful recombining                   |
| MnhA_amp_R                               | AATGAAGACGTTCTTTTCAATCAC                                                                                                                      | Use to amplify mnhA locus for confirmation of successful recombining                   |
| MurA1_amp_F                              | TTACAATCTGCACGACGAGTAAAT                                                                                                                      | Use to amplify murA locus for confirmation of successful recombining                   |
| MurA1_amp_R                              | AGCTTTAGCATACCTTTACCGATT                                                                                                                      | Use to amplify murA locus for confirmation of successful recombining                   |
| TufA_amp_F                               | TTTTACAATGCTCAAGACTCAACAA                                                                                                                     | Use to amplify tufA locus for confirmation of successful recombining                   |
| TufA_amp_R                               | ATCACTATGCTGAAGTCCAAAATC                                                                                                                      | Use to amplify tufA locus for confirmation of successful recombining                   |
| UbiE_amp_F                               | ACATTCCATTTTGATTGGAAGTTA                                                                                                                      | Use to amplify ubiE locus for confirmation of successful recombining                   |
| UbiE_amp_R                               | TGTTGACTGTTAAATTTGCTTCAA                                                                                                                      | Use to amplify ubiE locus for confirmation of successful recombining                   |
| unnamedA_amp_F                           | ATATGGCGATAAATCTGTGATGAAT                                                                                                                     | Use to amplify unnamedA locus for confirmation of successful recombining               |
| unnamedA_amp_R                           | TGGAACAACGCTAGAGTTAGAAAGAA                                                                                                                    | Use to amplify unnamedA locus for confirmation of successful recombining               |
| unnamedB_amp_F                           | TTATTTGGTCAAGATAGCTCGATT                                                                                                                      | Use to amplify unnamedB locus for confirmation of successful recombining               |
| unnamedB_amp_R                           | AGAATCACAAGATGTTGCTGTGTTA                                                                                                                     | Use to amplify unnamedB locus for confirmation of successful recombining               |
| agrA-F                                   | TGA TAA TCC TTA TGA GGT GCT T                                                                                                                 | Real time PCR primer for agrA                                                          |
| agrA-R                                   | CAC TGT GAC TCG TAA CGA AAA                                                                                                                   | Real time PCR primer for agrA                                                          |
| sigB-F                                   | TGT CGT GAG ATG TTG GG                                                                                                                        | Real time PCR primer for sigB                                                          |
| sigB-R                                   | CGA TTC CAG CTT CAT GT                                                                                                                        | Real time PCR primer for sigB                                                          |
| 16SrRNA-F                                | CTGGAACCTGAGACACGGTCC                                                                                                                         | Real time PCR primer for 16sRNA                                                        |
| 16SrRNA-R                                | GACCTTCATCACTACGCGG                                                                                                                           | Real time PCR primer for 16sRNA                                                        |
| <b>Recombining Oligos*</b>               |                                                                                                                                               |                                                                                        |
| BrnQ2_deletion_oligo                     | T*T*A*T*TCTGTGATATTTAATGGATCTGTTTTACAAATGCCCCATA<br>GCGAAGAGCGTAAACCAATGACCCATGATTTTTATTCAT                                                   | Use to engineer brnQ2 deletion in S. aureus                                            |
| srrA_deletion_oligo                      | C*T*A*T*TTAGCCGGCTCATCATAGATTAACTCAAATTTATACCCCTCG<br>ATTCATCCTCATCATCTACGATGATTTTCGTTCCGACAT                                                 | Use to engineer srrA deletion in S. aureus                                             |
| ctaB_deletion_oligo                      | C*T*A*G*ATCAAAGTAAAGTAAATGAAACAAATACAGCTAACACGAAAAAGTTA<br>ACTCTGTAATATTTGTGACAAAGTATGCTCTTTGCTCAT                                            | Use to engineer ctaB deletion in S. aureus                                             |
| MenF_deletion_oligo                      | T*T*A*T*GATTTCOCATTATCATCGACTCCTAATGACATTATCATAGGATAT<br>ATCTCTTTGACAATATCGTCTCTAATACGCCGCTAGCCAT                                             | Use to engineer menF deletion in S. aureus                                             |
| unnamedA_deletion_oligo                  | C*T*A*T*CCGTA AAACTGGAATAATTTTTAATAAGTTCTGACATAATTACAG<br>GTGCGCCATTACCTTTAGGTGGTTAATAGTTATTGTCAT                                             | Use to engineer unnamedA deletion in S. aureus                                         |
| mnhA_Ala722Thr_repair_up                 | C*A*A*A*AAAAAGAGAAATAATTAAGATTTGCTGTACACTTCTGATG <sub>a</sub> CiCTaAT<br>gTGTGTATCATTAATTTTTATTACACAACAACAGATGG                               | Use to engineer mnhA Ala722Thr mutation in S. aureus. Lower case indicates mismatches. |
| tufA_Ala271Val_repair_top                | G*c*aGcATATTACGTTGGTGTGCTCGTGAAGACGTACAA<br>T*T*A*G*AATAATACGATGGTTAAGATGAAATATATGACAAAGATAAAAAACA<br>TTAGATAAAGTATTGCTAGTAAATACAGATAAAATTCAT | Use to engineer tufA Ala271Val mutation in S. aureus. Lower case indicates mismatches. |
| unnamedB_deletion_oligo                  | T*T*A*G*ATCGTTAATACGTTCAATGTCTGCACCTAATTGCTTCAATTTTTCA<br>CCGGTTAATTTATTTCCACCTTTGATTACTATTTTATCCAT                                           | Use to engineer unnamedB deletion in S. aureus                                         |
| MurA1_deletion_oligo                     | T*T*A*T*ACACCTTTGGTATTCTTTTCTTTATAGCCAAAGGTGCATAAAA<br>ACCGATGACTTCTTTAATTTGCTTTATTGTGACGCCAT                                                 | Use to engineer murA deletion in S. aureus                                             |
| UbiE_deletion_oligo                      |                                                                                                                                               | Use to engineer ubiE deletion in S. aureus                                             |
| <b>Counterselection Oligonucleotides</b> |                                                                                                                                               |                                                                                        |
| ctaB_v2_sgRNA_down                       | AAAACTAACATCACCAAAACCG                                                                                                                        | Targets to PAM internal to ctaB deletion                                               |
| ctaB_v2_sgRNA_up                         | AGCTCGGTTTTGGTATGATGTTAGC                                                                                                                     | Targets to PAM internal to ctaB deletion                                               |
| MenF_sgRNA_down                          | AAAAACAATCTGAGAAACATCATCCG                                                                                                                    | Targets to PAM internal to menF deletion                                               |
| MenF_sgRNA_up                            | AGCTCGGATGATTTTTCTCAGATTGG                                                                                                                    | Targets to PAM internal to menF deletion                                               |
| unnamedA_v2_sgRNA_down                   | AAAACTCTCGTTCCGATGCAATCCG                                                                                                                     | Targets to PAM internal to unnamedA deletion                                           |
| unnamedA_v2_sgRNA_up                     | AGCTCGGATTGCATCCGAACGAGAGG                                                                                                                    | Targets to PAM internal to unnamedA deletion                                           |
| MnhA_sgRNA_down                          | AAAACTTGGCACCACATGTTCCCGG                                                                                                                     | Targets to PAM adjacent to engineered missense mutations in mnhA deletion              |
| MnhA_sgRNA_up                            | AGCTCGGGAACATGTGTTCCGAC                                                                                                                       | Targets to PAM adjacent to engineered missense mutations in mnhA deletion              |
| TufA_sgRNA_down                          | AAAAATGATTTCACTTCTCACCG                                                                                                                       | Targets to PAM adjacent to engineered missense mutations in tufA deletion              |
| TufA_sgRNA_up                            | AGCTCGTGAAGAAGTTGAAATCATG                                                                                                                     | Targets to PAM adjacent to engineered missense mutations in tufA deletion              |
| unnamedB_sgRNA_down                      | AAAACTGCACTCGACATTGCCGCG                                                                                                                      | Targets to PAM internal to unnamedB deletion                                           |
| unnamedB_sgRNA_up                        | AGCTCGGCGCAATGTCGAAGTACCG                                                                                                                     | Targets to PAM internal to unnamedB deletion                                           |
| MurA1_sgRNA_down                         | AAAAACCGCAATGCAACAATGACC                                                                                                                      | Targets to PAM internal to murA deletion                                               |
| MurA1_sgRNA_up                           | AGCTCGGATTTGTTGATGCTCCGG                                                                                                                      | Targets to PAM internal to murA deletion                                               |
| srrA_sgRNA_down                          | AAAAACCTGGATACCATCATTTTCCG                                                                                                                    | Targets to PAM internal to srrA deletion                                               |
| srrA_sgRNA_up                            | AGCTCGGAAATGGATGTATCCAGGG                                                                                                                     | Targets to PAM internal to srrA deletion                                               |
| UbiE_sgRNA_down                          | AAAAACCTGAAAACCTACGTACTCCG                                                                                                                    | Targets to PAM internal to ubiE deletion                                               |
| UbiE_sgRNA_up                            | AGCTCGGAGTACGTAGTTTTACAGGG                                                                                                                    | Targets to PAM internal to ubiE deletion                                               |
| BrnQ2_sgRNA_down                         | AAAACAATAATGTAACAACATCCCG                                                                                                                     | Targets to PAM internal to brnQ2 deletion                                              |
| BrnQ2_sgRNA_up                           | AGCTCGGATGGTTTACCATTTT                                                                                                                        | Targets to PAM internal to brnQ2 deletion                                              |

\*Asterisk (\*) indicates phosphothioate bond
